# Supplementary material for: Mental health status and quality of life in elderly patients with coronary heart disease
Source: PeerJ. 2021 Feb 17;9:e10903. doi: 10.7717/peerj.10903 (PMC7896500; doi:10.7717/peerj.10903)
Supplement: Supplemental Information 1 [file peerj-09-10903-s001.xlsx]

## Sheet: raw data 
Sex	Marital status	Height（cm）	Weight(kg)	BMI(kg/m2)	Age	Primary hypertension	Type 2DM	Stroke	number of positive factors	Somatization	Somatization(mean)	Obsessive-compulsive	Obsessive-compulsive(mean)	Interpersonal sensitivity	Interpersonal sensitivity(mean)	Depression	Depression(mean)	Anxiety	Anxiety(mean)	Hostility	Hostility(mean)	Phobic anxiety	Phobic anxiety(mean)	Paranoid ideation	Paranoid ideation(mean)	Psychoticism	Psychoticism(mean)	Physical domain	Psychological domain	Social domain	Environment domain
Female	Married	162	71	27.05	77	Yes	No	Yes	18	15	1.25	13	1.3	9	1	18	1.38462	18	1.8	8	1.33333	7	1	6	1	14	1.4	14.3	16	16	15
Male	Married	183	90	26.87	65	Yes	No	No	20	18	1.5	16	1.6	11	1.22222	15	1.15385	11	1.1	7	1.16667	7	1	6	1	12	1.2	12.6	12.7	14.7	15.5
Male	Married	173	74	24.73	74	Yes	No	No	60	19	1.58333	25	2.5	17	1.88889	29	2.23077	18	1.8	8	1.33333	14	2	8	1.33333	17	1.7	13.1	13.3	12	13.5
Female	Married	155	62	25.81	78	Yes	No	Yes	24	26	2.16667	20	2	11	1.22222	16	1.23077	10	1	7	1.16667	10	1.42857	7	1.16667	10	1	14.3	16	16	16
Female	Married	155	55	22.89	60	Yes	No	No	5	14	1.16667	10	1	9	1	13	1	10	1	7	1.16667	7	1	6	1	10	1	15.4	16	16	16.5
Male	Married	163	86	32.37	81	Yes	No	Yes	8	13	1.08333	14	1.4	9	1	17	1.30769	10	1	6	1	8	1.14286	6	1	10	1	16	16	16	17.5
Female	Married	158	55	22.03	78	Yes	No	No	15	18	1.5	17	1.7	9	1	17	1.30769	10	1	7	1.16667	13	1.85714	6	1	10	1	14.3	15.3	16	16
Female	Married	154	60	25.3	74	Yes	Yes	No	25	31	2.58333	13	1.3	9	1	22	1.69231	11	1.1	6	1	9	1.28571	6	1	11	1.1	11.4	14	14.7	16
Female	Married	162	54	20.58	60	Yes	No	No	28	19	1.58333	14	1.4	13	1.44444	23	1.76923	16	1.6	9	1.5	7	1	6	1	14	1.4	12.6	15.3	16	15.5
Female	Married	162	55	20.96	73	No	No	No	22	19	1.58333	15	1.5	10	1.11111	19	1.46154	14	1.4	6	1	8	1.14286	6	1	10	1	10.9	13.3	14.7	15
Male	Widowed	170	70	24.22	91	No	No	Yes	31	16	1.33333	18	1.8	16	1.77778	24	1.84615	18	1.8	12	2	8	1.14286	9	1.5	11	1.1	12.6	12	14.7	16.5
Female	Married	157	60	24.34	69	No	Yes	No	21	17	1.41667	17	1.7	9	1	22	1.69231	19	1.9	7	1.16667	7	1	6	1	10	1	14.3	14.7	14.7	16
Female	Married	169	60	21.71	64	Yes	No	No	5	13	1.08333	13	1.3	9	1	16	1.23077	10	1	6	1	7	1	6	1	10	1	15.4	16	14.7	15.5
Male	Married	168	62	21.97	65	Yes	No	No	4	13	1.08333	12	1.2	9	1	13	1	12	1.2	6	1	9	1.28571	6	1	10	1	15.4	15.3	16	17.5
Female	Married	152	56	24.24	86	No	No	No	9	15	1.25	14	1.4	9	1	21	1.61538	10	1	6	1	7	1	6	1	10	1	14.9	14.7	16	16
Male	Married	168	80	28.34	83	Yes	No	No	4	13	1.08333	10	1	9	1	15	1.15385	12	1.2	6	1	7	1	6	1	10	1	13.7	16	16	16
Male	Married	163	85	31.99	86	Yes	Yes	No	29	23	1.91667	14	1.4	9	1	24	1.84615	11	1.1	6	1	8	1.14286	6	1	16	1.6	14.9	16	14.7	15.5
Female	Married	156	70	28.76	60	Yes	Yes	No	2	12	1	11	1.1	9	1	13	1	10	1	8	1.33333	7	1	6	1	10	1	16	15.3	14.7	17
Male	Married	176	78	25.18	69	Yes	No	No	13	16	1.33333	14	1.4	9	1	16	1.23077	13	1.3	6	1	7	1	6	1	10	1	14.9	12	14.7	14.5
Female	Widowed	156	75	30.81	73	Yes	Yes	No	65	22	1.83333	22	2.2	17	1.88889	29	2.23077	20	2	12	2	11	1.57143	8	1.33333	16	1.6	10.9	10.7	9.3	14
Male	Married	164	72	26.77	70	Yes	No	No	4	12	1	11	1.1	9	1	15	1.15385	11	1.1	6	1	7	1	6	1	10	1	14.9	16	16	16
Female	Married	156	70	28.76	75	Yes	No	Yes	14	18	1.5	13	1.3	9	1	18	1.38462	12	1.2	7	1.16667	7	1	6	1	13	1.3	14.9	14	16	16
Female	Married	155	60	24.97	67	Yes	No	No	33	26	2.16667	16	1.6	14	1.55556	20	1.53846	20	2	8	1.33333	8	1.14286	7	1.16667	13	1.3	14.9	14	13.3	14
Female	Married	155	70	29.14	89	Yes	Yes	No	23	16	1.33333	20	2	10	1.11111	18	1.38462	14	1.4	6	1	7	1	7	1.16667	14	1.4	11.4	12	13.3	14.5
Female	Married	159	62	24.52	72	Yes	Yes	No	41	26	2.16667	20	2	12	1.33333	29	2.23077	17	1.7	8	1.33333	10	1.42857	11	1.83333	15	1.5	9.7	12	9.3	14.5
Female	Married	157	70	29.21	60	Yes	No	No	31	20	1.66667	18	1.8	10	1.11111	18	1.38462	15	1.5	7	1.16667	7	1	7	1.16667	12	1.2	10.9	10	12	14.5
Female	Married	170	60	20.76	73	Yes	Yes	No	10	12	1	14	1.4	9	1	15	1.15385	11	1.1	10	1.66667	7	1	6	1	10	1	13.7	16	16	16.5
Female	Married	150	54	24	67	Yes	Yes	No	33	19	1.58333	18	1.8	12	1.33333	20	1.53846	15	1.5	11	1.83333	8	1.14286	7	1.16667	11	1.1	12.6	13.3	12	15
Male	Married	174	85	28.08	62	Yes	No	No	14	12	1	13	1.3	9	1	15	1.15385	15	1.5	6	1	9	1.28571	6	1	12	1.2	13.1	13.3	16	16
Male	Married	179	90	28.09	84	Yes	No	No	10	12	1	13	1.3	11	1.22222	16	1.23077	12	1.2	6	1	8	1.14286	6	1	10	1	15.4	16	16	16
Female	Married	150	59	26.22	79	Yes	Yes	Yes	10	17	1.41667	16	1.6	9	1	17	1.30769	13	1.3	6	1	9	1.28571	6	1	10	1	14.3	16	16	15.5
Male	Married	165	72	26.45	77	Yes	Yes	No	16	20	1.66667	13	1.3	10	1.11111	16	1.23077	13	1.3	6	1	7	1	6	1	10	1	14.9	14.7	16	16
Female	Married	153	66	28.19	65	Yes	No	No	36	23	1.91667	18	1.8	10	1.11111	25	1.92308	13	1.3	8	1.33333	7	1	7	1.16667	16	1.6	10.3	10.7	9.3	16
Female	Married	162	56	21.34	67	No	Yes	No	14	19	1.58333	18	1.8	12	1.33333	19	1.46154	12	1.2	6	1	7	1	6	1	10	1	15.4	15.3	16	16
Male	Married	165	72	26.45	81	No	No	No	11	14	1.16667	16	1.6	9	1	20	1.53846	10	1	6	1	7	1	6	1	11	1.1	14.3	14.7	16	16.5
Female	Married	164	72	26.77	83	Yes	No	No	8	15	1.25	11	1.1	9	1	15	1.15385	12	1.2	6	1	7	1	6	1	10	1	15.4	15.3	14.7	17
Male	Married	180	86	26.54	71	No	No	No	19	21	1.75	18	1.8	9	1	20	1.53846	14	1.4	7	1.16667	7	1	7	1.16667	11	1.1	14.9	14.7	16	16
Female	Married	166	70	25.4	85	Yes	No	Yes	12	17	1.41667	11	1.1	9	1	16	1.23077	13	1.3	6	1	8	1.14286	6	1	11	1.1	12.6	12	14.7	15
Female	Married	165	75	27.55	88	Yes	No	No	19	15	1.25	17	1.7	9	1	28	2.15385	11	1.1	17	2.83333	11	1.57143	6	1	10	1	10.3	12	14.7	15
Male	Married	181	95	29	66	Yes	No	No	11	24	2	14	1.4	9	1	21	1.61538	10	1	6	1	7	1	6	1	10	1	10.9	15.3	16	15
Female	Married	165	76	27.92	64	Yes	No	No	19	25	2.08333	23	2.3	9	1	18	1.38462	13	1.3	7	1.16667	7	1	6	1	12	1.2	10.9	13.3	14.7	16.5
Male	Married	170	75	25.95	89	Yes	Yes	No	22	25	2.08333	15	1.5	10	1.11111	25	1.92308	11	1.1	6	1	8	1.14286	6	1	13	1.3	10.9	14.7	16	14.5
Male	Married	178	75	23.67	76	Yes	Yes	Yes	23	23	1.91667	15	1.5	12	1.33333	28	2.15385	16	1.6	7	1.16667	10	1.42857	6	1	13	1.3	10.9	14.7	14.7	17
Female	Married	165	76	27.92	81	Yes	No	No	21	32	2.66667	15	1.5	11	1.22222	24	1.84615	16	1.6	6	1	7	1	6	1	10	1	10.9	13.3	16	15.5
Female	Married	169	70	24.51	62	Yes	Yes	No	30	37	3.08333	24	2.4	10	1.11111	29	2.23077	10	1	12	2	9	1.28571	6	1	13	1.3	10.3	10.7	12	15.5
Female	Married	166	68	24.68	82	Yes	Yes	Yes	28	36	3	19	1.9	9	1	26	2	22	2.2	8	1.33333	7	1	6	1	14	1.4	8.6	9.3	12	15.5
Male	Married	172	70	23.66	64	Yes	No	No	38	25	2.08333	21	2.1	20	2.22222	29	2.23077	18	1.8	13	2.16667	8	1.14286	14	2.33333	13	1.3	13.7	12	12	17.5
Male	Married	172	75	25.35	71	Yes	Yes	No	38	40	3.33333	26	2.6	12	1.33333	24	1.84615	18	1.8	12	2	9	1.28571	9	1.5	19	1.9	6.9	8.7	12	14
Female	Married	161	70	23.94	87	Yes	No	No	26	28	2.33333	20	2	11	1.22222	25	1.92308	15	1.5	8	1.33333	7	1	6	1	10	1	13.7	11.3	14.7	16
Male	Married	175	85	27.76	86	No	No	No	9	23	1.91667	12	1.2	10	1.11111	18	1.38462	10	1	6	1	7	1	6	1	10	1	13.1	14	16	16
Male	Married	176	76	24.54	84	Yes	Yes	No	7	15	1.25	13	1.3	9	1	16	1.23077	11	1.1	6	1	7	1	6	1	11	1.1	16.6	16	14.7	16
Female	Married	165	75	27.55	64	Yes	Yes	No	33	22	1.83333	21	2.1	14	1.55556	29	2.23077	20	2	11	1.83333	9	1.28571	6	1	18	1.8	14.3	14.7	16	16.5
Male	Married	178	82	25.88	84	Yes	Yes	No	15	22	1.83333	14	1.4	9	1	20	1.53846	12	1.2	8	1.33333	7	1	6	1	10	1	12.6	16	14.7	16.5
Female	Married	155	68	28.3	83	Yes	No	No	17	27	2.25	19	1.9	9	1	28	2.15385	10	1	6	1	8	1.14286	6	1	10	1	14.3	13.3	14.7	16.5
Female	Married	158	69	27.64	77	Yes	No	No	22	21	1.75	18	1.8	9	1	27	2.07692	15	1.5	10	1.66667	9	1.28571	6	1	10	1	13.1	14.7	16	16.5
Female	Married	163	80	30.11	68	Yes	Yes	No	40	38	3.16667	24	2.4	18	2	26	2	21	2.1	12	2	23	3.28571	9	1.5	13	1.3	6.9	8.7	14.7	14.5
Male	Married	168	67	23.74	60	Yes	Yes	No	24	34	2.83333	17	1.7	11	1.22222	17	1.30769	17	1.7	10	1.66667	8	1.14286	8	1.33333	14	1.4	12.6	13.3	14.7	14.5
Male	Married	168	77	27.28	60	Yes	Yes	No	30	40	3.33333	19	1.9	11	1.22222	24	1.84615	20	2	6	1	8	1.14286	6	1	13	1.3	9.7	10.7	13.3	14
Female	Married	160	70	27.34	77	Yes	No	No	20	26	2.16667	21	2.1	9	1	23	1.76923	15	1.5	6	1	10	1.42857	6	1	10	1	13.7	16	14.7	16
Female	Married	163	63	23.71	70	Yes	No	No	18	21	1.75	15	1.5	14	1.55556	19	1.46154	13	1.3	6	1	7	1	8	1.33333	12	1.2	14.9	14.7	12	16
Female	Married	155	60	24.97	64	Yes	No	No	28	28	2.33333	12	1.2	12	1.33333	18	1.38462	18	1.8	12	2	10	1.42857	8	1.33333	12	1.2	15.4	14.7	16	15.5
Female	Married	158	65	26.03	66	No	Yes	No	13	17	1.41667	14	1.4	9	1	15	1.15385	10	1	6	1	7	1	6	1	10	1	13.7	15.3	14.7	17.5
Male	Married	168	77	27.28	87	Yes	No	No	37	28	2.33333	19	1.9	11	1.22222	35	2.69231	22	2.2	9	1.5	16	2.28571	6	1	11	1.1	8	10	14.7	14.5
Male	Married	178	72	22.72	73	Yes	Yes	No	7	17	1.41667	12	1.2	9	1	15	1.15385	10	1	6	1	7	1	6	1	12	1.2	16	16	16	17
Female	Married	160	63	24.61	75	Yes	No	No	20	23	1.91667	30	3	12	1.33333	15	1.15385	13	1.3	6	1	10	1.42857	12	2	10	1	13.1	13.3	14.7	17
Male	Widowed	168	78	27.64	63	Yes	Yes	No	31	27	2.25	22	2.2	13	1.44444	24	1.84615	27	2.7	10	1.66667	9	1.28571	10	1.66667	15	1.5	8	10.7	13.3	14
Male	Married	170	80	27.68	60	No	No	No	23	19	1.58333	18	1.8	11	1.22222	23	1.76923	12	1.2	13	2.16667	7	1	10	1.66667	12	1.2	12.6	8.7	9.3	10
Female	Married	163	63	23.71	83	Yes	Yes	No	35	28	2.33333	25	2.5	14	1.55556	37	2.84615	21	2.1	9	1.5	15	2.14286	6	1	13	1.3	13.7	10.7	16	16
Female	Married	157	60	24.34	61	Yes	No	No	30	26	2.16667	18	1.8	17	1.88889	22	1.69231	24	2.4	8	1.33333	17	2.42857	9	1.5	13	1.3	12.6	15.3	14.7	15
Male	Married	176	91	29.38	60	Yes	No	No	14	17	1.41667	16	1.6	18	2	18	1.38462	13	1.3	13	2.16667	7	1	9	1.5	12	1.2	14.3	14	9.3	16
Female	Married	162	65	24.77	82	Yes	Yes	Yes	31	26	2.16667	18	1.8	14	1.55556	30	2.30769	15	1.5	9	1.5	13	1.85714	9	1.5	13	1.3	8.6	10	14.7	14.5
Male	Married	175	75	24.49	70	No	No	No	19	18	1.5	17	1.7	9	1	23	1.76923	16	1.6	6	1	9	1.28571	8	1.33333	12	1.2	10.9	15.3	14.7	14
Male	Married	175	70	22.86	70	Yes	Yes	Yes	12	19	1.58333	14	1.4	9	1	29	2.23077	10	1	6	1	14	2	6	1	10	1	9.1	10	16	15
Female	Married	157	60	24.34	64	Yes	Yes	No	47	38	3.16667	25	2.5	20	2.22222	27	2.07692	27	2.7	13	2.16667	7	1	9	1.5	14	1.4	6.3	7.3	9.3	12.5
Female	Married	162	67	25.53	60	Yes	Yes	No	11	21	1.75	15	1.5	9	1	17	1.30769	10	1	7	1.16667	7	1	6	1	10	1	15.4	14.7	14.7	16.5
Female	Married	158	55	22.03	60	Yes	Yes	No	17	15	1.25	15	1.5	18	2	22	1.69231	14	1.4	11	1.83333	9	1.28571	6	1	10	1	15.4	14.7	16	15
Female	Married	165	70	25.71	60	Yes	No	No	40	40	3.33333	22	2.2	13	1.44444	27	2.07692	15	1.5	13	2.16667	12	1.71429	9	1.5	12	1.2	8	8.7	12	12.5
Male	Married	178	76	23.99	64	Yes	Yes	No	13	17	1.41667	14	1.4	9	1	19	1.46154	10	1	11	1.83333	7	1	6	1	10	1	13.7	14.7	14.7	17.5
Male	Married	170	70	24.22	82	Yes	No	No	17	27	2.25	14	1.4	9	1	20	1.53846	10	1	6	1	10	1.42857	6	1	12	1.2	13.7	15.3	13.3	15.5
Female	Married	165	60	22.03	81	Yes	No	No	15	20	1.66667	16	1.6	11	1.22222	20	1.53846	14	1.4	6	1	7	1	6	1	12	1.2	16	16.7	17.3	17.5
Female	Married	158	55	22.03	79	Yes	Yes	Yes	42	35	2.91667	19	1.9	12	1.33333	35	2.69231	25	2.5	6	1	20	2.85714	9	1.5	21	2.1	7.4	10.7	12	13.5
Female	Married	167	78	27.97	67	Yes	No	No	17	23	1.91667	16	1.6	10	1.11111	17	1.30769	13	1.3	7	1.16667	7	1	6	1	10	1	14.9	16	16	15.5
Male	Married	172	82	27.72	67	Yes	Yes	No	11	19	1.58333	13	1.3	9	1	17	1.30769	10	1	13	2.16667	7	1	6	1	12	1.2	14.3	13.3	16	15.5
Male	Married	170	76	26.3	72	Yes	Yes	No	13	15	1.25	14	1.4	11	1.22222	26	2	10	1	6	1	7	1	6	1	11	1.1	16	11.3	14.7	17
Female	Married	163	71	26.72	66	No	No	No	29	31	2.58333	20	2	11	1.22222	20	1.53846	16	1.6	11	1.83333	7	1	8	1.33333	16	1.6	13.1	13.3	16	16.5
Female	Married	165	67	24.61	71	Yes	Yes	No	30	37	3.08333	17	1.7	9	1	26	2	20	2	8	1.33333	7	1	6	1	16	1.6	9.1	12	14.7	13.5
Male	Married	167	70	25.1	65	Yes	Yes	No	20	20	1.66667	19	1.9	9	1	24	1.84615	11	1.1	9	1.5	7	1	6	1	10	1	13.1	16	14.7	18
Female	Married	160	64	25	63	Yes	No	No	14	19	1.58333	14	1.4	11	1.22222	17	1.30769	18	1.8	10	1.66667	7	1	6	1	12	1.2	10.3	8	14.7	15
Female	Married	160	63	24.61	85	Yes	Yes	Yes	23	31	2.58333	22	2.2	9	1	31	2.38462	13	1.3	9	1.5	16	2.28571	6	1	10	1	12.6	14	13.3	16
Female	Married	158	70	28.84	77	Yes	No	Yes	27	27	2.25	19	1.9	12	1.33333	27	2.07692	14	1.4	11	1.83333	11	1.57143	6	1	10	1	10.9	12	14.7	15.5
Male	Married	170	80	27.68	61	Yes	No	No	7	15	1.25	14	1.4	9	1	17	1.30769	10	1	7	1.16667	7	1	6	1	10	1	16.6	14	12	15.5
Female	Married	160	64	25	75	Yes	Yes	No	39	33	2.75	28	2.8	21	2.33333	38	2.92308	14	1.4	12	2	22	3.14286	9	1.5	14	1.4	6.9	10	18.7	12.5
Male	Married	170	79	27.34	62	No	No	Yes	25	35	2.91667	18	1.8	9	1	18	1.38462	12	1.2	12	2	7	1	6	1	10	1	11.4	16	16	13
Female	Married	158	59	23.63	76	Yes	Yes	Yes	51	42	3.5	29	2.9	15	1.66667	36	2.76923	24	2.4	6	1	17	2.42857	12	2	21	2.1	5.7	12.7	12	13.5
Male	Married	172	80	27.04	71	Yes	No	Yes	45	28	2.33333	26	2.6	22	2.44444	28	2.15385	21	2.1	11	1.83333	18	2.57143	11	1.83333	18	1.8	10.3	10.7	10.7	14
Male	Married	180	86	26.54	78	Yes	Yes	No	13	14	1.16667	18	1.8	9	1	15	1.15385	15	1.5	6	1	8	1.14286	6	1	10	1	14.9	16	16	17
Male	Married	176	73	23.57	79	Yes	No	Yes	34	42	3.5	20	2	31	3.44444	22	1.69231	20	2	15	2.5	11	1.57143	14	2.33333	17	1.7	11.4	14.7	14.7	14.5
Female	Married	159	56	22.15	90	Yes	Yes	No	27	38	3.16667	21	2.1	16	1.77778	23	1.76923	10	1	6	1	10	1.42857	9	1.5	10	1	12	14	9.3	12.5
Male	Married	168	70	24.8	60	Yes	No	No	16	24	2	16	1.6	11	1.22222	19	1.46154	14	1.4	9	1.5	7	1	6	1	10	1	14.9	14.7	16	16.5
Male	Married	172	80	27.04	70	Yes	No	Yes	20	16	1.33333	19	1.9	14	1.55556	16	1.23077	16	1.6	6	1	10	1.42857	10	1.66667	12	1.2	15.4	17.3	16	17.5
Female	Married	160	53	20.7	61	Yes	Yes	No	36	46	3.83333	28	2.8	22	2.44444	26	2	14	1.4	11	1.83333	18	2.57143	14	2.33333	14	1.4	6.9	14	14.7	15.5
Female	Married	153	56	23.92	60	Yes	No	Yes	26	16	1.33333	19	1.9	16	1.77778	53	4.07692	13	1.3	10	1.66667	11	1.57143	6	1	20	2	7.4	5.3	6.7	10
Male	Married	175	65	21.22	72	Yes	Yes	No	53	44	3.66667	30	3	18	2	48	3.69231	29	2.9	11	1.83333	19	2.71429	11	1.83333	23	2.3	9.7	12	14.7	16
Female	Married	162	69	26.29	81	Yes	Yes	No	31	37	3.08333	18	1.8	14	1.55556	27	2.07692	20	2	8	1.33333	13	1.85714	8	1.33333	14	1.4	8.6	14.7	14.7	16
Male	Married	175	80	26.12	61	Yes	No	No	9	26	2.16667	15	1.5	9	1	16	1.23077	10	1	6	1	7	1	6	1	10	1	16.6	15.3	17.3	15.5
Female	Married	152	61	26.4	80	No	No	No	23	38	3.16667	15	1.5	11	1.22222	21	1.61538	12	1.2	6	1	13	1.85714	6	1	10	1	11.4	15.3	14.7	15
Female	Widowed	160	69	26.95	79	Yes	No	No	62	45	3.75	35	3.5	25	2.77778	56	4.30769	30	3	9	1.5	28	4	15	2.5	28	2.8	6.9	10	14.7	11.5
Male	Married	184	95	28.06	74	Yes	No	No	5	12	1	12	1.2	10	1.11111	14	1.07692	10	1	6	1	7	1	6	1	10	1	14.9	16	14.7	16.5
Male	Married	170	79	27.34	68	Yes	Yes	No	14	19	1.58333	14	1.4	9	1	22	1.69231	12	1.2	7	1.16667	8	1.14286	6	1	12	1.2	12.6	14	14.7	16
Female	Married	165	63	23.14	78	Yes	No	No	30	28	2.33333	22	2.2	11	1.22222	23	1.76923	16	1.6	6	1	21	3	10	1.66667	20	2	9.1	14	14.7	9
Male	Married	176	76	24.54	69	Yes	Yes	No	9	17	1.41667	16	1.6	9	1	20	1.53846	14	1.4	6	1	7	1	6	1	10	1	14.3	16	14.7	16
Male	Married	178	93	29.35	63	Yes	No	No	3	16	1.33333	10	1	9	1	16	1.23077	10	1	6	1	7	1	6	1	10	1	14.9	14.7	16	16
Female	Widowed	155	67	27.89	80	Yes	No	No	57	28	2.33333	29	2.9	17	1.88889	43	3.30769	29	2.9	9	1.5	14	2	11	1.83333	25	2.5	7.4	8.7	12	15.5
Male	Married	178	87	27.46	67	Yes	Yes	No	9	26	2.16667	10	1	9	1	14	1.07692	10	1	6	1	10	1.42857	6	1	13	1.3	12	17.3	14.7	16
Male	Married	165	72	26.45	70	Yes	Yes	No	23	13	1.08333	15	1.5	17	1.88889	22	1.69231	19	1.9	8	1.33333	10	1.42857	6	1	14	1.4	13.7	14.7	14.7	16.5
Female	Married	160	72	28.13	83	No	No	No	11	17	1.41667	15	1.5	10	1.11111	16	1.23077	12	1.2	6	1	7	1	6	1	10	1	14.9	14	14.7	16
Female	Married	164	65	24.17	68	Yes	Yes	No	17	25	2.08333	13	1.3	9	1	22	1.69231	12	1.2	6	1	13	1.85714	6	1	15	1.5	10.3	13.3	14.7	15.5
Male	Married	171	69	23.6	70	No	No	No	13	13	1.08333	12	1.2	11	1.22222	21	1.61538	14	1.4	6	1	9	1.28571	6	1	10	1	14.9	14	14.7	16.5
Male	Married	173	80	26.73	70	Yes	Yes	No	12	16	1.33333	13	1.3	12	1.33333	15	1.15385	13	1.3	9	1.5	7	1	8	1.33333	13	1.3	13.7	13.3	9.3	16
Male	Married	177	85	27.13	78	Yes	No	Yes	37	38	3.16667	20	2	11	1.22222	24	1.84615	14	1.4	9	1.5	9	1.28571	12	2	14	1.4	8.6	11.3	13.3	15.5
Male	Married	178	83	26.2	66	No	No	Yes	9	21	1.75	11	1.1	9	1	16	1.23077	11	1.1	6	1	7	1	6	1	10	1	16	14.7	14.7	16
Female	Married	162	67	25.53	74	Yes	Yes	Yes	36	31	2.58333	18	1.8	11	1.22222	22	1.69231	14	1.4	7	1.16667	9	1.28571	7	1.16667	16	1.6	13.7	13.3	14.7	16
Male	Married	185	90	26.3	60	Yes	Yes	No	11	20	1.66667	14	1.4	9	1	17	1.30769	17	1.7	6	1	7	1	6	1	12	1.2	14.9	14.7	14.7	16.5
Female	Married	158	58	23.23	74	Yes	Yes	No	51	34	2.83333	21	2.1	25	2.77778	32	2.46154	16	1.6	13	2.16667	15	2.14286	9	1.5	20	2	10.9	12.7	12	14
Female	Married	164	70	26.03	74	Yes	No	Yes	19	22	1.83333	18	1.8	10	1.11111	21	1.61538	14	1.4	6	1	7	1	6	1	13	1.3	14.3	14	14.7	15
Male	Married	170	78	26.99	86	Yes	No	No	8	13	1.08333	11	1.1	9	1	13	1	12	1.2	7	1.16667	7	1	6	1	14	1.4	13.7	14	14.7	15
Male	Married	172	83	28.06	77	Yes	No	No	10	17	1.41667	13	1.3	9	1	15	1.15385	10	1	8	1.33333	7	1	6	1	11	1.1	15.4	16	16	16.5
Male	Married	170	81	28.03	65	Yes	No	No	14	17	1.41667	15	1.5	9	1	15	1.15385	15	1.5	12	2	9	1.28571	6	1	16	1.6	14.3	13.3	14.7	16
Male	Married	169	71	24.86	61	Yes	No	No	35	36	3	16	1.6	12	1.33333	22	1.69231	18	1.8	9	1.5	10	1.42857	8	1.33333	16	1.6	12	13.3	14.7	16
Female	Married	164	55	20.45	68	Yes	No	No	36	31	2.58333	18	1.8	10	1.11111	22	1.69231	17	1.7	7	1.16667	10	1.42857	7	1.16667	15	1.5	12.6	12.7	14.7	16
Female	Married	156	69	28.35	62	Yes	No	No	6	22	1.83333	10	1	9	1	13	1	14	1.4	6	1	7	1	6	1	14	1.4	13.1	16	16	16
Female	Married	160	76	29.69	77	Yes	Yes	Yes	33	29	2.41667	23	2.3	15	1.66667	25	1.92308	15	1.5	9	1.5	11	1.57143	11	1.83333	18	1.8	10.9	11.3	10.7	14
Female	Married	163	79	29.73	70	Yes	No	No	27	29	2.41667	20	2	13	1.44444	22	1.69231	18	1.8	8	1.33333	7	1	8	1.33333	14	1.4	13.1	13.3	14.7	15
Female	Married	168	75	26.57	73	Yes	Yes	Yes	25	27	2.25	17	1.7	9	1	22	1.69231	16	1.6	10	1.66667	13	1.85714	8	1.33333	17	1.7	12.6	12.7	14.7	13.5
Female	Married	158	72	28.84	80	Yes	Yes	No	35	40	3.33333	15	1.5	15	1.66667	25	1.92308	19	1.9	9	1.5	11	1.57143	12	2	19	1.9	10.3	14.7	14.7	12.5
Male	Married	170	81	28.03	74	Yes	No	No	13	26	2.16667	16	1.6	9	1	17	1.30769	12	1.2	6	1	7	1	6	1	10	1	14.9	14.7	14.7	15
Male	Married	168	70	25.51	66	Yes	No	No	11	19	1.58333	12	1.2	12	1.33333	16	1.23077	12	1.2	6	1	7	1	6	1	11	1.1	14.9	14.7	14.7	16.5
Male	Married	172	83	28.06	72	Yes	Yes	Yes	34	30	2.5	20	2	12	1.33333	21	1.61538	16	1.6	15	2.5	14	2	12	2	17	1.7	9.7	14.7	16	14.5
Female	Married	159	67	26.5	60	Yes	No	No	35	24	2	20	2	13	1.44444	26	2	22	2.2	9	1.5	13	1.85714	9	1.5	15	1.5	12.1	11.3	15.5	16
Female	Married	160	63	24.61	60	Yes	Yes	Yes	64	55	4.58333	33	3.3	19	2.11111	55	4.23077	35	3.5	10	1.66667	14	2	15	2.5	31	3.1	4	6	14.7	14.5
Female	Married	153	62	26.49	68	No	No	No	13	22	1.83333	16	1.6	9	1	18	1.38462	10	1	6	1	7	1	6	1	14	1.4	18.9	15.3	16	15
Female	Married	162	69	26.29	75	Yes	No	No	38	35	2.91667	27	2.7	10	1.11111	28	2.15385	20	2	7	1.16667	11	1.57143	6	1	20	2	12	12	16	16
Female	Married	152	61	26.4	69	No	Yes	No	35	33	2.75	23	2.3	14	1.55556	23	1.76923	21	2.1	9	1.5	10	1.42857	10	1.66667	18	1.8	10.3	11.3	14.7	14.5
Male	Married	168	71	25.16	68	Yes	Yes	Yes	34	20	1.66667	23	2.3	12	1.33333	23	1.76923	14	1.4	8	1.33333	12	1.71429	8	1.33333	21	2.1	14.9	14.7	14.7	16
Male	Married	172	80	27.04	65	Yes	No	No	7	23	1.91667	24	2.4	13	1.44444	20	1.53846	13	1.3	9	1.5	12	1.71429	6	1	18	1.8	15.4	16	14.7	16.5
Male	Married	175	65	21.22	72	Yes	Yes	Yes	13	14	1.16667	16	1.6	11	1.22222	27	2.07692	10	1	6	1	10	1.42857	6	1	12	1.2	11.4	11.3	13.3	14
Male	Widowed	175	81	26.45	82	Yes	No	Yes	28	22	1.83333	21	2.1	14	1.55556	22	1.69231	14	1.4	9	1.5	10	1.42857	12	2	18	1.8	12.6	15.3	14.7	17
Male	Married	175	76	24.82	60	Yes	No	No	15	13	1.08333	14	1.4	11	1.22222	15	1.15385	13	1.3	9	1.5	7	1	8	1.33333	13	1.3	11.6	12.6	13.3	15
Female	Married	160	53	20.7	82	Yes	No	Yes	49	30	2.5	29	2.9	20	2.22222	29	2.23077	21	2.1	10	1.66667	13	1.85714	12	2	22	2.2	11.4	12.7	14.7	14.5
Female	Married	154	57	24.03	71	Yes	No	Yes	30	29	2.41667	22	2.2	14	1.55556	24	1.84615	15	1.5	11	1.83333	9	1.28571	10	1.66667	19	1.9	8	11.3	16	8.5
Male	Married	180	87	26.85	60	Yes	No	No	13	23	1.91667	15	1.5	9	1	16	1.23077	13	1.3	7	1.16667	7	1	6	1	14	1.4	13.7	11.4	16	16
Female	Married	153	66	28.19	75	Yes	No	No	32	26	2.16667	27	2.7	21	2.33333	17	1.30769	17	1.7	17	2.83333	7	1	10	1.66667	14	1.4	16	15.3	14.7	16.5
Female	Married	165	63	23.14	70	Yes	Yes	Yes	30	34	2.83333	15	1.5	16	1.77778	13	1	16	1.6	9	1.5	13	1.85714	8	1.33333	19	1.9	13.7	12.7	16	16.5
Female	Married	163	65	24.46	77	No	Yes	Yes	55	35	2.91667	25	2.5	21	2.33333	34	2.61538	19	1.9	12	2	10	1.42857	13	2.16667	25	2.5	9.1	10	14.7	14.5
Female	Married	158	65	26.04	71	Yes	Yes	No	25	30	2.5	18	1.8	10	1.11111	19	1.46154	18	1.8	6	1	10	1.42857	7	1.16667	19	1.9	13.7	11.3	14.7	14.5
Female	Married	154	69	29.09	86	Yes	Yes	Yes	26	21	1.75	18	1.8	14	1.55556	20	1.53846	11	1.1	6	1	10	1.42857	7	1.16667	17	1.7	12	13.3	16	15.5
Female	Married	157	66	26.78	73	Yes	Yes	No	51	28	2.33333	20	2	18	2	26	2	22	2.2	9	1.5	12	1.71429	13	2.16667	27	2.7	9.1	10.7	14.7	15
Female	Married	159	69	27.29	70	Yes	Yes	No	38	32	2.66667	26	2.6	20	2.22222	23	1.76923	20	2	9	1.5	9	1.28571	10	1.66667	15	1.5	11.4	14.7	14.7	15
Male	Married	179	73	22.78	73	Yes	Yes	Yes	23	22	1.83333	18	1.8	12	1.33333	20	1.53846	14	1.4	12	2	9	1.28571	6	1	12	1.2	13.7	15.3	16	15.5
Male	Married	173	69	23.05	73	Yes	No	Yes	30	26	2.16667	23	2.3	13	1.44444	21	1.61538	17	1.7	8	1.33333	8	1.14286	8	1.33333	15	1.5	12.6	16	14.7	16.5
Female	Married	158	67	26.83	88	Yes	No	Yes	45	32	2.66667	26	2.6	16	1.77778	31	2.38462	15	1.5	8	1.33333	13	1.85714	6	1	19	1.9	10.9	13.3	12	12.5
Female	Married	156	68	27.94	77	Yes	Yes	Yes	48	45	3.75	31	3.1	17	1.88889	34	2.61538	18	1.8	13	2.16667	9	1.28571	9	1.5	18	1.8	10.9	12	12	13
Male	Married	177	86	27.45	76	Yes	Yes	No	45	35	2.91667	21	2.1	14	1.55556	20	1.53846	21	2.1	18	3	15	2.14286	11	1.83333	19	1.9	10.3	9.3	12	6.5
Female	Married	165	63	23.14	64	Yes	Yes	No	35	29	2.41667	20	2	12	1.33333	23	1.76923	17	1.7	11	1.83333	16	2.28571	9	1.5	17	1.7	9.7	9.3	10.7	9.5
Female	Married	163	65	24.46	68	Yes	No	No	16	13	1.08333	15	1.5	12	1.33333	16	1.23077	15	1.5	9	1.5	9	1.28571	9	1.5	18	1.8	13.1	13.3	16	15.5
Male	Married	175	83	27.1	87	Yes	Yes	Yes	52	32	2.66667	24	2.4	15	1.66667	31	2.38462	21	2.1	9	1.5	23	3.28571	8	1.33333	18	1.8	10.3	12	16	15.5
Male	Married	170	77	26.64	65	Yes	No	Yes	14	14	1.16667	16	1.6	10	1.11111	18	1.38462	11	1.1	7	1.16667	7	1	7	1.16667	11	1.1	17.7	20	20	19.5
Female	Married	159	68	26.9	69	Yes	Yes	Yes	45	38	3.16667	22	2.2	22	2.44444	40	3.07692	21	2.1	10	1.66667	17	2.42857	13	2.16667	25	2.5	14.3	11.3	16	15.5
Female	Married	163	67	25.22	70	Yes	Yes	No	35	27	2.25	15	1.5	15	1.66667	31	2.38462	23	2.3	6	1	9	1.28571	6	1	16	1.6	13.7	10	12	14.5
Male	Married	173	83	27.73	75	Yes	No	No	27	24	2	16	1.6	12	1.33333	18	1.38462	17	1.7	6	1	12	1.71429	6	1	16	1.6	10.9	13.3	13.3	15.5
Female	Married	160	68	26.56	72	Yes	Yes	Yes	64	40	3.33333	26	2.6	25	2.77778	41	3.15385	30	3	11	1.83333	18	2.57143	11	1.83333	26	2.6	10.3	10	6.7	15.5
Male	Married	170	71	24.57	80	Yes	No	No	23	20	1.66667	18	1.8	14	1.55556	20	1.53846	15	1.5	9	1.5	9	1.28571	9	1.5	13	1.3	15.4	13.3	17.3	17.5
Female	Married	163	66	24.84	70	Yes	No	No	13	17	1.41667	14	1.4	10	1.11111	17	1.30769	13	1.3	6	1	7	1	6	1	11	1.1	16	13.3	16	15
Female	Married	162	56	21.34	75	Yes	No	Yes	36	25	2.08333	18	1.8	13	1.44444	27	2.07692	15	1.5	8	1.33333	14	2	7	1.16667	18	1.8	12.6	15.3	13.3	15
Female	Married	154	75	31.62	77	Yes	No	No	29	24	2	15	1.5	10	1.11111	17	1.30769	18	1.8	8	1.33333	10	1.42857	8	1.33333	13	1.3	13.7	16	14.7	17
Female	Married	157	69	27.99	66	Yes	No	Yes	50	41	3.41667	29	2.9	14	1.55556	32	2.46154	23	2.3	9	1.5	16	2.28571	10	1.66667	19	1.9	9.7	12	16	14.5
Female	Married	157	67	27.18	86	Yes	Yes	Yes	52	42	3.5	30	3	16	1.77778	34	2.61538	20	2	9	1.5	15	2.14286	9	1.5	19	1.9	9.7	13.3	14.7	14.5
Male	Married	174	85	28.08	63	Yes	Yes	No	28	24	2	18	1.8	19	2.11111	19	1.46154	13	1.3	9	1.5	9	1.28571	11	1.83333	12	1.2	15.4	16	14.7	15
Female	Married	150	64	28.44	80	Yes	Yes	Yes	59	43	3.58333	23	2.3	24	2.66667	39	3	22	2.2	10	1.66667	25	3.57143	10	1.66667	22	2.2	5.7	9.3	13.3	13
Female	Married	163	75	28.23	84	Yes	No	Yes	50	35	2.91667	25	2.5	14	1.55556	40	3.07692	21	2.1	10	1.66667	13	1.85714	10	1.66667	24	2.4	8	12.7	14.7	11.5
Female	Married	159	69	27.29	60	Yes	No	No	35	26	2.16667	21	2.1	15	1.66667	18	1.38462	18	1.8	9	1.5	10	1.42857	7	1.16667	15	1.5	11.4	16	14.7	15.5
Female	Married	160	70	27.34	81	Yes	No	Yes	68	50	4.16667	35	3.5	26	2.88889	41	3.15385	26	2.6	11	1.83333	19	2.71429	14	2.33333	24	2.4	7.4	10.7	10.7	14.5
Female	Married	162	62	23.62	60	Yes	No	No	33	28	2.33333	18	1.8	19	2.11111	23	1.76923	20	2	12	2	7	1	10	1.66667	14	1.4	14.9	16	16	16.5
Female	Married	155	67	27.89	75	No	Yes	No	37	35	2.91667	21	2.1	17	1.88889	20	1.53846	16	1.6	8	1.33333	10	1.42857	8	1.33333	18	1.8	14.3	15.3	14.7	15.5
Male	Married	170	73	25.26	62	Yes	No	No	28	16	1.33333	17	1.7	16	1.77778	24	1.84615	20	2	10	1.66667	7	1	9	1.5	12	1.2	14.9	12.7	12	15
Female	Married	159	62	24.52	60	Yes	Yes	No	29	35	2.91667	18	1.8	16	1.77778	19	1.46154	21	2.1	11	1.83333	9	1.28571	9	1.5	13	1.3	15.4	16	14.7	15
Male	Married	173	85	28.4	62	Yes	Yes	No	35	28	2.33333	17	1.7	17	1.88889	23	1.76923	17	1.7	10	1.66667	8	1.14286	13	2.16667	14	1.4	14.3	13.3	14.7	15
Male	Married	175	79	25.8	81	Yes	No	No	23	18	1.5	17	1.7	9	1	24	1.84615	11	1.1	6	1	12	1.71429	6	1	17	1.7	10.9	11.3	13.3	10
Male	Married	173	71	23.72	62	Yes	No	No	32	28	2.33333	19	1.9	9	1	21	1.61538	16	1.6	9	1.5	10	1.42857	7	1.16667	17	1.7	13.1	12.7	12	14
Female	Married	158	62	24.84	65	Yes	No	No	8	14	1.16667	13	1.3	9	1	13	1	10	1	6	1	10	1.42857	6	1	10	1	18.3	18	20	17.5
Female	Married	160	70	27.34	70	Yes	No	No	20	16	1.33333	14	1.4	10	1.11111	17	1.30769	13	1.3	7	1.16667	8	1.14286	6	1	13	1.3	14.9	16	16	16
Male	Married	178	75	23.67	64	Yes	No	No	7	13	1.08333	12	1.2	10	1.11111	14	1.07692	11	1.1	7	1.16667	7	1	6	1	10	1	18.3	17.3	16	16.5
Female	Married	160	58	22.66	63	No	No	No	30	13	1.08333	13	1.3	11	1.22222	13	1	13	1.3	11	1.83333	8	1.14286	7	1.16667	12	1.2	10.9	12.7	12	16
Male	Married	178	69	21.78	75	No	No	No	24	19	1.58333	21	2.1	13	1.44444	21	1.61538	12	1.2	7	1.16667	7	1	6	1	10	1	15.4	14	16	15.5
Female	Married	155	59	24.56	60	No	No	No	22	36	3	20	2	9	1	18	1.38462	15	1.5	6	1	9	1.28571	6	1	10	1	14.3	16	14.7	16.5
Male	Married	177	68	21.71	67	No	No	No	12	22	1.83333	14	1.4	9	1	18	1.38462	10	1	9	1.5	7	1	6	1	10	1	16.6	16.7	16	18
Male	Widowed	180	73	22.53	72	No	No	No	31	22	1.83333	27	2.7	12	1.33333	28	2.15385	15	1.5	9	1.5	11	1.57143	11	1.83333	16	1.6	13.7	16	16	16.5
Female	Married	162	68	25.91	64	No	No	No	12	24	2	14	1.4	9	1	17	1.30769	12	1.2	6	1	7	1	6	1	10	1	14.9	15.3	14.7	17
Male	Married	178	72	22.72	66	No	No	No	14	12	1	16	1.6	9	1	22	1.69231	12	1.2	9	1.5	9	1.28571	6	1	10	1	10.9	10	14.7	16.5
Male	Married	175	71	23.18	77	No	No	No	19	22	1.83333	24	2.4	9	1	23	1.76923	14	1.4	6	1	7	1	8	1.33333	10	1	15.4	14.7	14.7	16
Male	Married	169	64	22.41	63	No	No	No	25	37	3.08333	16	1.6	9	1	21	1.61538	13	1.3	9	1.5	7	1	6	1	12	1.2	13.1	14	13.3	16.5
Female	Married	156	60	24.65	70	No	No	No	24	29	2.41667	22	2.2	9	1	17	1.30769	17	1.7	6	1	11	1.57143	6	1	13	1.3	12	12.7	14.7	15
Male	Married	179	76	23.72	62	No	No	No	9	18	1.5	12	1.2	9	1	17	1.30769	13	1.3	6	1	7	1	6	1	10	1	14.9	16	14.7	16.5
Male	Married	180	80	24.69	76	No	No	No	11	15	1.25	13	1.3	11	1.22222	19	1.46154	10	1	6	1	7	1	6	1	15	1.5	14.9	11.3	12	11.5
Male	Married	175	77	25.12	76	No	No	No	16	18	1.5	19	1.9	9	1	18	1.38462	15	1.5	6	1	9	1.28571	6	1	10	1	14.3	16	14.7	16.5
Female	Married	157	63	25.56	63	No	No	No	16	26	2.16667	18	1.8	9	1	13	1	18	1.8	6	1	7	1	6	1	13	1.3	14.3	14	14.7	16
Male	Married	178	73	23.04	68	No	No	No	9	21	1.75	10	1	9	1	13	1	13	1.3	6	1	7	1	8	1.33333	13	1.3	16	13.3	14.7	16
Female	Married	163	71	26.72	67	No	No	No	14	16	1.33333	17	1.7	9	1	14	1.07692	11	1.1	7	1.16667	7	1	6	1	10	1	14.9	15.3	16	16.5
Male	Married	177	75	23.94	77	No	No	No	28	42	3.5	18	1.8	16	1.77778	21	1.61538	15	1.5	7	1.16667	7	1	8	1.33333	14	1.4	12	14	14.7	16
Female	Married	174	85	28.08	64	No	No	No	23	32	2.66667	17	1.7	14	1.55556	16	1.23077	17	1.7	17	2.83333	7	1	9	1.5	14	1.4	14.9	16.7	14.7	16
Male	Married	170	75	25.95	78	No	No	No	13	16	1.33333	12	1.2	11	1.22222	17	1.30769	11	1.1	8	1.33333	7	1	8	1.33333	11	1.1	14.9	14	12	15.5
Male	Married	174	78	25.76	70	No	No	No	33	16	1.33333	21	2.1	12	1.33333	23	1.76923	16	1.6	6	1	10	1.42857	10	1.66667	14	1.4	11.4	12.7	12	15.5
Female	Married	158	65	26.04	65	No	No	No	30	25	2.08333	15	1.5	18	2	20	1.53846	23	2.3	12	2	13	1.85714	9	1.5	15	1.5	10.3	10	10	8.5
Male	Married	179	74	23.09	74	No	No	No	21	15	1.25	20	2	9	1	21	1.61538	16	1.6	7	1.16667	8	1.14286	6	1	11	1.1	16.6	16	16	16.5
Female	Married	158	65	26.04	60	No	No	No	26	28	2.33333	21	2.1	9	1	25	1.92308	16	1.6	6	1	10	1.42857	6	1	17	1.7	11.4	11.3	16	15.5
Female	Married	160	67	26.17	88	No	No	No	28	24	2	22	2.2	11	1.22222	22	1.69231	19	1.9	6	1	10	1.42857	7	1.16667	18	1.8	11.4	12.7	13.3	14.5
